# Supplementary material for: Curcumin Mitigates Oxidative Damage in Broiler Liver and Ileum Caused by Aflatoxin B1-Contaminated Feed through Nrf2 Signaling Pathway
Source: MDPI journal article supplement (doi:10.3390/ani14030409), 2024-01-26
Supplement: s1 [file s1]

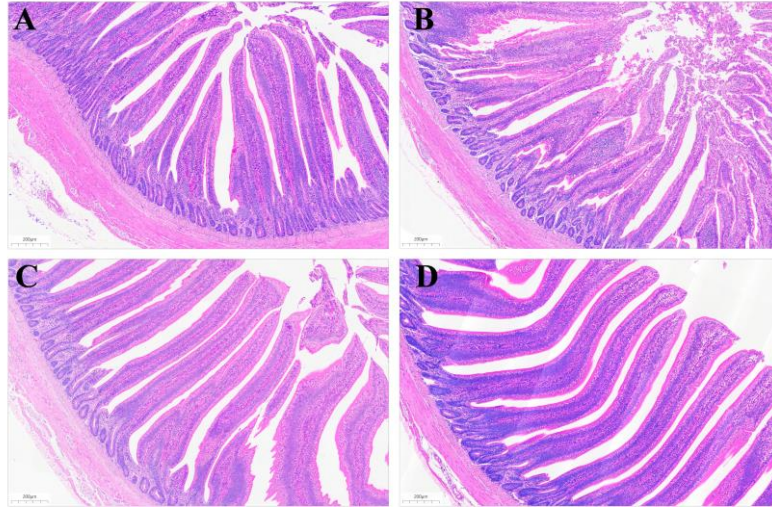

**Figure S1.** Histological examination broiler ileum (Bar = 200  $\mu\text{m}$ ). (A) Control group. (B) AFB1 group. (C) AFB1+CUR group. (D) CUR group.
